# Supplementary material for: Spectroscopic analysis of the interaction between human serum albumin and newly synthesized quinoline derivatives
Source: Research Square preprint supplement (doi:10.21203/rs.3.rs-7600040/v1), 2025-10-07
Supplement: Supplementary file 1 [file c32f52f8f44edcd99099a76d.docx]

Scheme 1. Synthesis of 1-methyl-4-aminoquinolinium-3-thiolates (**2**) and 1-methyl-4-aminoquiniolinium salts (**3**). Reagents and conditions: (a) RNH2, Py, room temp.; (b) R1Br, Toluene, room temp.

***Materials and Methods***

*Chemistry*

Melting points are uncorrected. NMR spectra were recorded using a Bruker Ascend 600 spectrometer (Bruker, Billerica, MA, USA). Standard experimental conditions and standard Bruker programs were used. The 1H NMR and 13C NMR spectral data are provided relative to the TMS signal at 0.0 ppm. HR mass spectra were recorded with a Bruker Impact II (Bruker, Billerica, MA, USA).

Synthesis of 1-methyl-4-aminoquinolinium-3-thiolates (**2**)

Argon was passed through the suspension of bis-chloride (1) (0.419 g, 1 mmol) in dry pyridine (15 mL) at RT over 15 min. Amine (2.5 mmol) was added and argon passed for further 15 min. The mixture was then stirred at RT for 7 days. The solid product was filtered off and washed with dry ether. The raw product was purified through recrystallization from ethanol.

*1-methyl-4-(propylamino)quinolinium-3-thiolate (****2a****):* yield: 67%; 1H NMR (DMSO, 600 MHz), δ(ppm): 1.03-1.07 (t, *J*=7.2 Hz, 3H, CH2CH3), 1.72-1.81 (m, 2H CH2CH2CH3), 3.90-3.95 (m, 2H NHCH2CH2), 4.03 (s, 3H, NCH3), 7.46-7.51 (m, 1H, Harom), 7.66-7.71 (m, 1H, Harom),7.82-7.86 (m, 1H, Harom), 8.32-8.36 (m, 1H, Harom), 8.41 (s, 1H, H2), 8.95 (s, 1H, NH); 13C NMR (DMSO, 150.9 MHz), δ (ppm): 11.80, 23.79, 41.67, 49.39, 113.94, 118.12, 124.39, 125.38, 129.97, 134.74, 136.25, 141.83, 156.30; ESI-HRMS Calcd. for C13H16N2S [M]+ = 232.1034, found: 232.1032.

1-methyl-4-(benzylamino)quinolinium-3-thiolate (***2b***): yield: 78%; 1H NMR (DMSO, 600 MHz), δ(ppm): 4.06 (s, 3H, NCH3), 5.20-5.24 (d, *J*=4.8Hz, NHCH2), 7.29-7.32 (m, 1H Harom), 7.32-48 (m, 5H, Harom), 7.62-7.72 (m, 1H, Harom), 782-7.89 (m, 1H, Harom), 8.30-8.39 (m, 1H, Harom), 8.50 (s, 1H H2), 9.26 ( 1H, NH); 13C NMR (DMSO, 150.9 MHz), δ (ppm): 41.82, 51.12, 114.15, 118.24, 124.53, 125.32, 127.87, 128.08, 129.29, 129.85, 135.57, 136.03, 138.77, 142.43, 156.38; ESI-HRMS Calcd. for C17H16N2S [M]+ = 280.1034, found: 280.1030.

1-methyl-4-(phenylamino)quinolinium-3-thiolate (***2c***): yield: 75%; 1H NMR (DMSO, 600 MHz), δ(ppm): 4.23 (s, 3H, NCH3), 7.03-7.12 (m, 2H, Harom), 7.12-7.22 (m, 1H, Harom), 7.28-7.41 (m, 3H, Harom), 7.45-7.60 (m, 1H, Harom), 7.60-7.70 (m, 1H, Harom), 7.97-8.02(m, 1H, Harom), 8.82 (s, 1H, H2), 10.04 (s, 1H, NH); 13C NMR (DMSO, 150.9 MHz), δ (ppm): 42.48, 115.69, 119.14, 123.73, 124.84, 125.44, 129.26, 129.92, 135.66, 141.97, 146.46, 152.84; ESI-HRMS Calcd. for C16H14N2S [M]+ = 266.0877, found: 266.0877.

Synthesis of 1-methyl-4-aminoquinolinium bromide (**3**)

To a suspension of 1 mmol of thiolate (**2**) in anhydrous toluene was added 3 mmol of the appropriate acetylene bromide. The mixture was stirred at room temperature for 72 h. The resulting precipitate was filtered off and washed with anhydrous toluene. The crude product was purified by crystallization from anhydrous ethanol.

*1-methyl-3-propargylthio-4-(propylamino)quinolinium bromide (****3a****)*: yield: 87%; 1H NMR (DMSO, 600 MHz), δ(ppm): 0.90-1.00 (t, *J*=7.2 Hz, 3H, CH2CH3), 1.70-1.80 (m, 2H CH2CH2CH3), 3.28-3.32 (m, 1H, CCH), 3.70-3.80 (m, 2H, HNCH2), 3.98-4.07 (d, *J*=6 Hz, 2H, SCH2C) 4.15 (s, 3H, NCH3), 7.70-7.82 (m, 1H, Harom), 8.02-8.12 (m, 2H, Harom), 8.68-8.83 (m, 1H, Harom), 8.97 (s, 1H, H2), 9.42 (bs, 1H, NH); ESI-HRMS Calcd. for C16H19N2S [M]+ = 271.1268, found: 271.1269.

*1-methyl-3-propargylthio-4-(benzylamino)quinolinium bromide (****3b****)*: yield: 91%; 1H NMR (DMSO, 600 MHz), δ(ppm): 3.28-3.32 (m, 1H, CCH); 3.60-3.65 (m, 2H, SCH2), 4.14 (s; 3H, CH3), 5.38-5.45 (m, 2H, NCH2), 7.20-7.30 (m, 1H, Harom), 7.30-7.38 (m, 4H, Harom),7.70-7.82 (m, 1H, Harom), 8.01-8.11 (m, 2H, Harom), 8.75-8.85 (m, 1H, Harom), 8.93 (s, 1H, H2), 9.89 (bs, 1H, NH); Calcd. for C20H19N2S [M]+ = 319.1268, found: 319.1267.

*1-methyl-3-propargylthio-4-(phenylamino)quinolinium bromide (****3c****)*: yield: 85%; 1H NMR (DMSO, 600 MHz), δ(ppm): 3.15-3.25 (m, 1H, CCH); 3.68-3.78 (m, 2H, SCH2), 4.31 (s; 3H, CH3), 7.21-7.35 (m, 3H, Harom), 7.35-7.50 (m, 2H, Harom), 7.68-7.80 (m, 1H, Harom), 8.02-8.15 (m, 1H, Harom), 8.15-8.25 (m, 1H, Harom), 8.30-8.40 (m, 1H, Harom),9.18 (s, 1H, H2), 10.77 (s, 1H, NH); 13C NMR (DMSO, 150.9 MHz), δ(ppm);24.16, 42.94, 76.01, 79.63, 110.01, 119.48, 119.61, 124.50, 125.95, 127.12, 127.85, 129.84, 134.86, 139.09, 140.70, 153.11, 156.02;ESI-HRMS Calcd. for C19H17N2S [M]+ = 305.1124, found: 305.1112

*1-methyl-3-(but-3-yn-1-yl)thio-4-(benzylamino)quinolinium bromide (****3d****)*: yield: 91%; 1H NMR (DMSO, 600 MHz), δ(ppm): 2.37-2.42 (m, 2H, CH2), 2.83-2.89 (t, *J* = 6Hz, 2H, SCH2), 2.89-2.92 (m, 1H, CH), 4.14 (s, 3H, CH3), 5.38-5.42 (d, *J* = 4.8Hz, 2H, NCH2), 7.27-7.30 (m, 1H, Harom), 7.30-7.38 (m, 4H, Harom), 7.72-7.82 (m, 1H, Harom), 8.04-8.10 (m, 2H, Harom), 8.75-8.88 (m, 1H, Harom), 8.98 (s, 1H, H2quinolinyl), 9.55-9.82 (m, 1H, NH); ESI-HRMS Calcd. for C21H21N2S [M]+ = 333.1425, found: 333.1421
